# Supplementary material for: Analytical “bake-off” of whole genome sequencing quality for the Genome Russia project using a small cohort for autoimmune hepatitis
Source: PubMed Central journal article supplement (PMC6040705; doi:10.1371/journal.pone.0200423), 2018-07-11

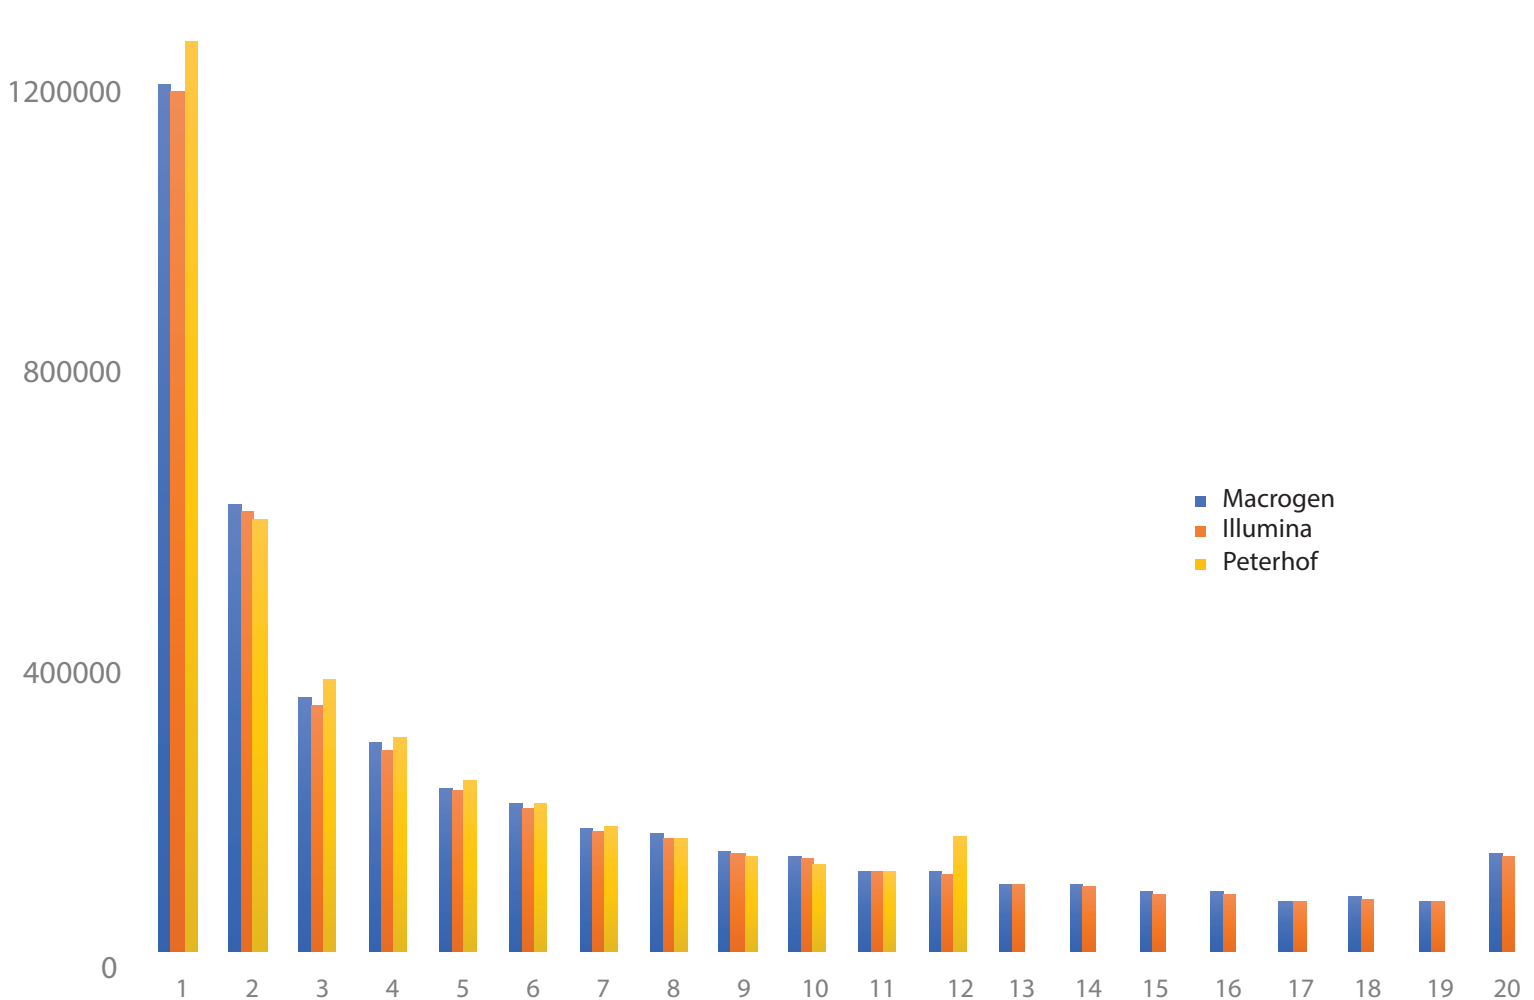

Supplement: pone.0200423.s001.pdf [file pone.0200423.s001.pdf]
